# Supplementary material
Source: HighWire-hosted journal article supplement (https://bmjopen.bmj.com/content/6/6/e010192)
Supplement: inline-supplementary-material-2 [file inline-supplementary-material-2.pdf]

## Participant Information Form (Non-Intervention wards)

|                                                                         |                                                                                                                                                              |
|-------------------------------------------------------------------------|--------------------------------------------------------------------------------------------------------------------------------------------------------------|
| <b>Title</b>                                                            | Establishing the effectiveness, cost-effectiveness and student experience of simulation training for the prevention of falls amongst hospitalised inpatients |
| <b>Short Title</b>                                                      | STOP-Falls: Simulation Training On Prevention                                                                                                                |
| <b>Protocol Number</b>                                                  | 1.3                                                                                                                                                          |
| <b>Principal Investigator</b>                                           | Cylie Williams                                                                                                                                               |
| <b>Associate Investigator(s)</b><br><i>(if required by institution)</i> | Prof Terry Haines, Dr Steve Maloney, Prof Debra Nestel, Dr Kelly-Ann Bowles, Ms Debra Kiegaldie                                                              |
| <b>Location</b> <i>(where CPI/PI will recruit)</i>                      | Frankston                                                                                                                                                    |

---

Prevention of falls is an Australian quality and safety priority particularly within health care services. There is little education about falls prevention strategies provided to undergraduate health professional students, either during university subjects or on orientation to Peninsula Health. The research team are interested in determining if undergraduate students are trained in falls prevention, does that impact on falls within the inpatient setting and does training improve the knowledge and falls prevention strategies of students.

You are invited to take part in this research project. We are interested in hearing about your experiences in falls prevention as part of your student placement. Please keep this information sheet.

Participation in answering these questions is voluntary. If you don't wish to answer these questions, you don't have to. Your clinical placement supervisors will not be notified of your participation choice. Please read this explanatory statement in full before making a decision. It is not expected that you will directly benefit from this research and there is no payment for being part of this research.

Your student coordinators has emailed you this link for your consideration. The survey will take between 5-10 minutes. Information will be collected through a survey platform: Qualtrics.: The privacy statement of Qualtrics may be accessed here: <http://qualtrics.com/privacy-statement/>

There are no questions within these questionnaires expected to cause emotional distress or discomfort. You can withdraw your consent at any time simply by not returning your questionnaire or completing it online. If you do consent and answer questions at any time point, anything you have answered will be used within the research. You will not be able to withdraw the answers to any questions you have answered.

The results of these questionnaires are confidential. You will be asked to create a unique code so we can match your answers at each time point. We won't be able to identify you from these questions or code. Your responses will only be viewed by the research team.

The collected responses will be stored in accordance with Australian Privacy Regulations, and kept as a data file that is password protected for 5 years. After this, the file will be deleted. A report of this study will be submitted for publication, but individuals will not be identifiable in this report.

On completion of the survey, you will have the opportunity to enter a prize draw. Only one entry is allowed and you may win one of 20, \$10 Coles Group & Myer gift cards. This is a game of chance and has two draws. Ten (10) will be drawn on the 21<sup>st</sup> of December and another 10 on the 30<sup>th</sup> of July. You also have the option to leave your email at the completion of the third survey if you would like a copy of the outcomes of this research.

This research has been approved Peninsula Health Human Research Ethics Committee (LRR15/PH/11)

If you would like to contact the research team about aspects of this study or have a complaint concerning the manner in which this research is being conducted, please contact:

Cylie Williams  
Peninsula Health  
Trial Coordinator  
[cyliewilliams@phcn.vic.gov.au](mailto:cyliewilliams@phcn.vic.gov.au)

If you have any complaints about any aspect of the project, the way it is being conducted or any questions about being a research participant in general, then you may contact:

|                        |                                                                                    |
|------------------------|------------------------------------------------------------------------------------|
| Reviewing HREC name    | Peninsula Health                                                                   |
| HREC Executive Officer | Manager – Research Program                                                         |
| Telephone              | 03 9788 1473                                                                       |
| Email                  | <a href="mailto:researchethics@phcn.vic.gov.au">researchethics@phcn.vic.gov.au</a> |
